# Supplementary material
Source: publisher figshare collection journal article supplement (https://springernature.figshare.com/ndownloader/files/12737126)

# Unactivated Spermatid: Mean Relative Abundance

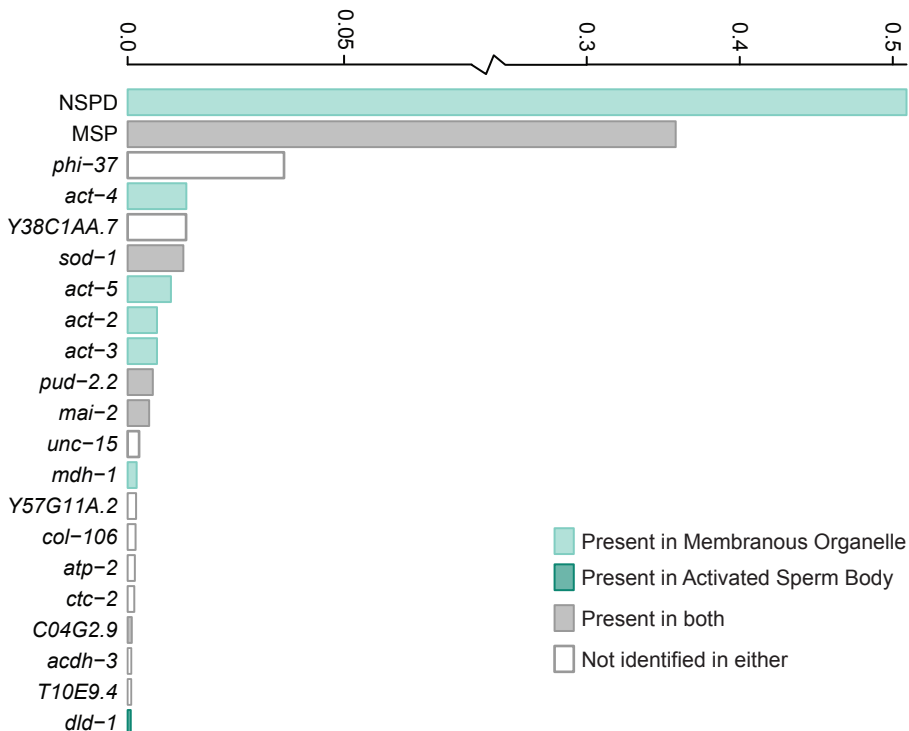

Supplement: Supplementary file [file 12737126]
